# Supplementary material for: Enhanced Hybridization Selectivity Using Structured GammaPNA Probes
Source: MDPI journal article supplement (doi:10.3390/molecules25040970), 2020-02-21
Supplement: s1 [file s1]

## **SUPPORTING INFORMATION FOR**

### **Enhanced Hybridization Selectivity Using Structured $\gamma$ PNA Probes**

Canady, et al

**Figure S1.** Overlay of SPR sensorgrams for struc\_ $\gamma$ PNA and unstruc\_ $\gamma$ PNA with perfect match DNA target showing greater dissociation of struc\_ $\gamma$ PNA.

**Figure S2.** UV melting curves of unstruc\_ $\gamma$ PNA with perfect match and single mismatch DNA targets

**Figure S3.** UV melting curves of struc\_ $\gamma$ PNA with perfect match and single mismatch DNA targets

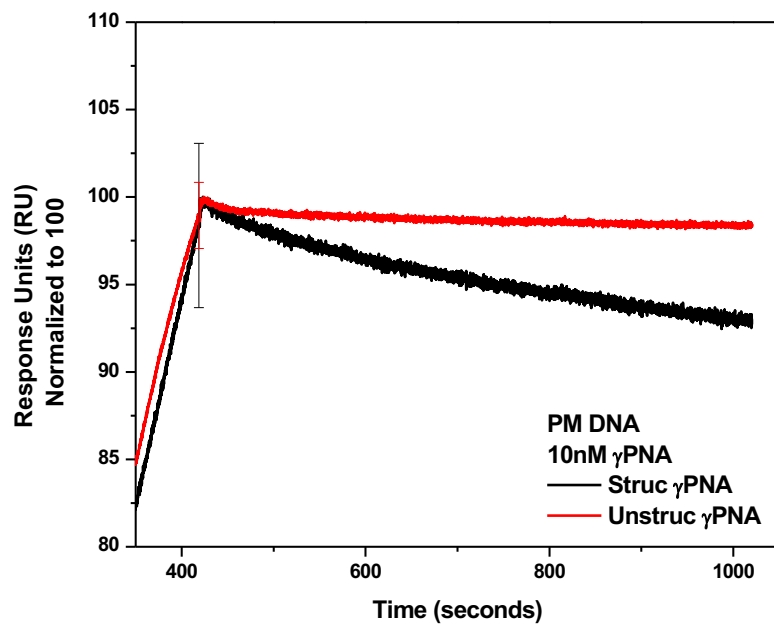

**Figure S1.** Overlay of SPR sensorgrams showing binding of 10 nM struc\_ $\gamma$ PNA or unstruc\_ $\gamma$ PNA to perfect match DNA target. Sensorgrams were scaled to 100% at time where flow changed from  $\gamma$ PNA to buffer. Structured probe exhibits significantly greater dissociation from chip.

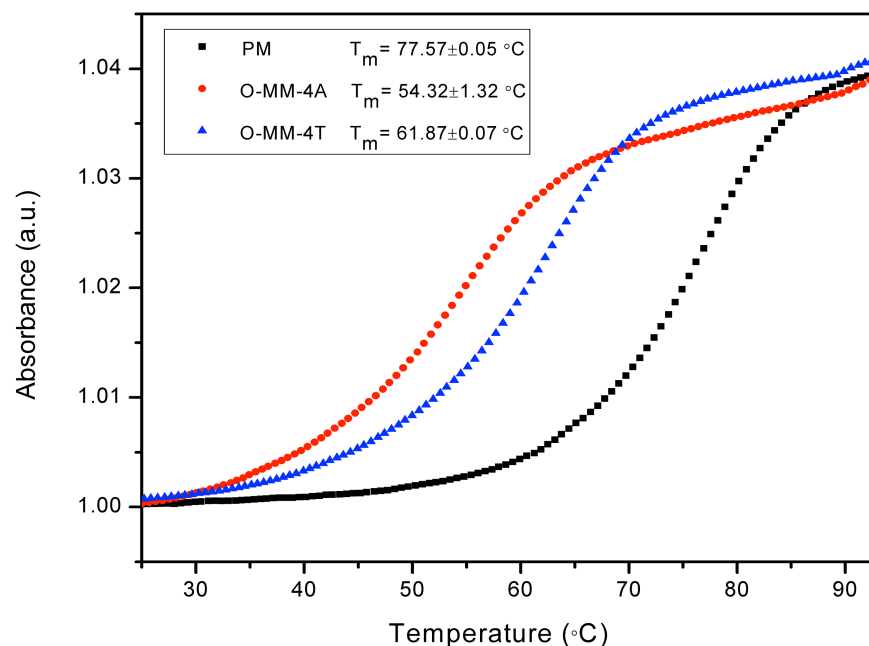

**Figure S2.** UV-vis melting analysis of unstruc\_γPNA with PM, O-MM-4T and O-MM-4A DNA. All samples contained 2 μM DNA and 2 μM unstruc\_γPNA in 100 mM NaCl, 10 mM Tris-HCL (pH = 7.4), and 0.1 mM Na<sub>2</sub>EDTA. Absorbance was measured at 260 nm.

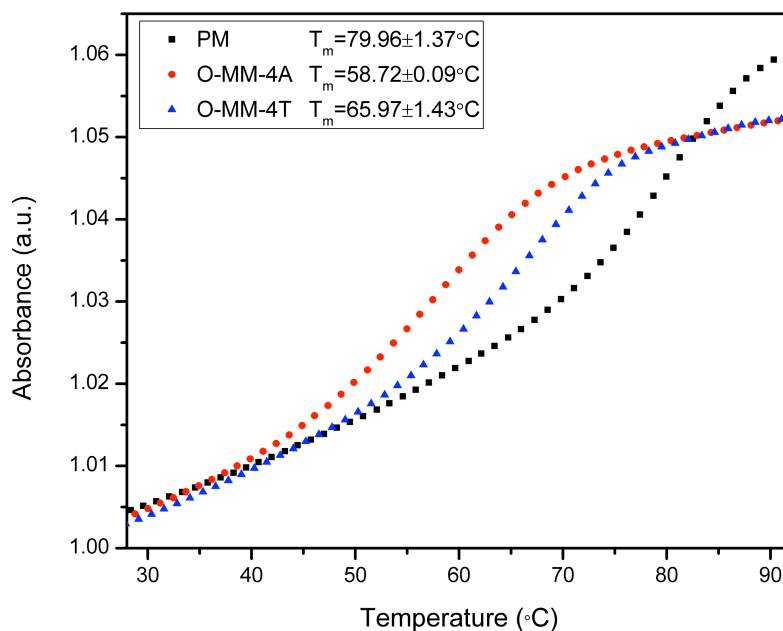

**Figure S3.** UV-vis melting analysis of struc\_γPNA with PM, O-MM-4T and O-MM-4A DNA. All samples contained 2 μM DNA and 2 μM unstruc\_γPNA in 100 mM NaCl, 10 mM Tris-HCL (pH = 7.4), and 0.1 mM Na<sub>2</sub>EDTA. Absorbance was measured at 260 nm. Melting temperatures are higher and destabilizations smaller than for unstructured probe (Figure S2).
